# Supplementary material for: Structural Insights into Plasticity and Discovery of Flavonoid Allosteric Inhibitors of Flavivirus NS2B–NS3 Protease
Source: MDPI journal article supplement (doi:10.3390/biophysica3010006), 2023-02-01
Supplement: s1 [file s1]

Archive with 1 entries (1 files):
- biophysica-2161594-supplementary.pdf
